# Supplementary material
Source: Frontiers journal article supplement (https://www.frontiersin.org/articles/515883)
Supplement: Data_Sheet_7.PDF [file Data_Sheet_7.PDF]

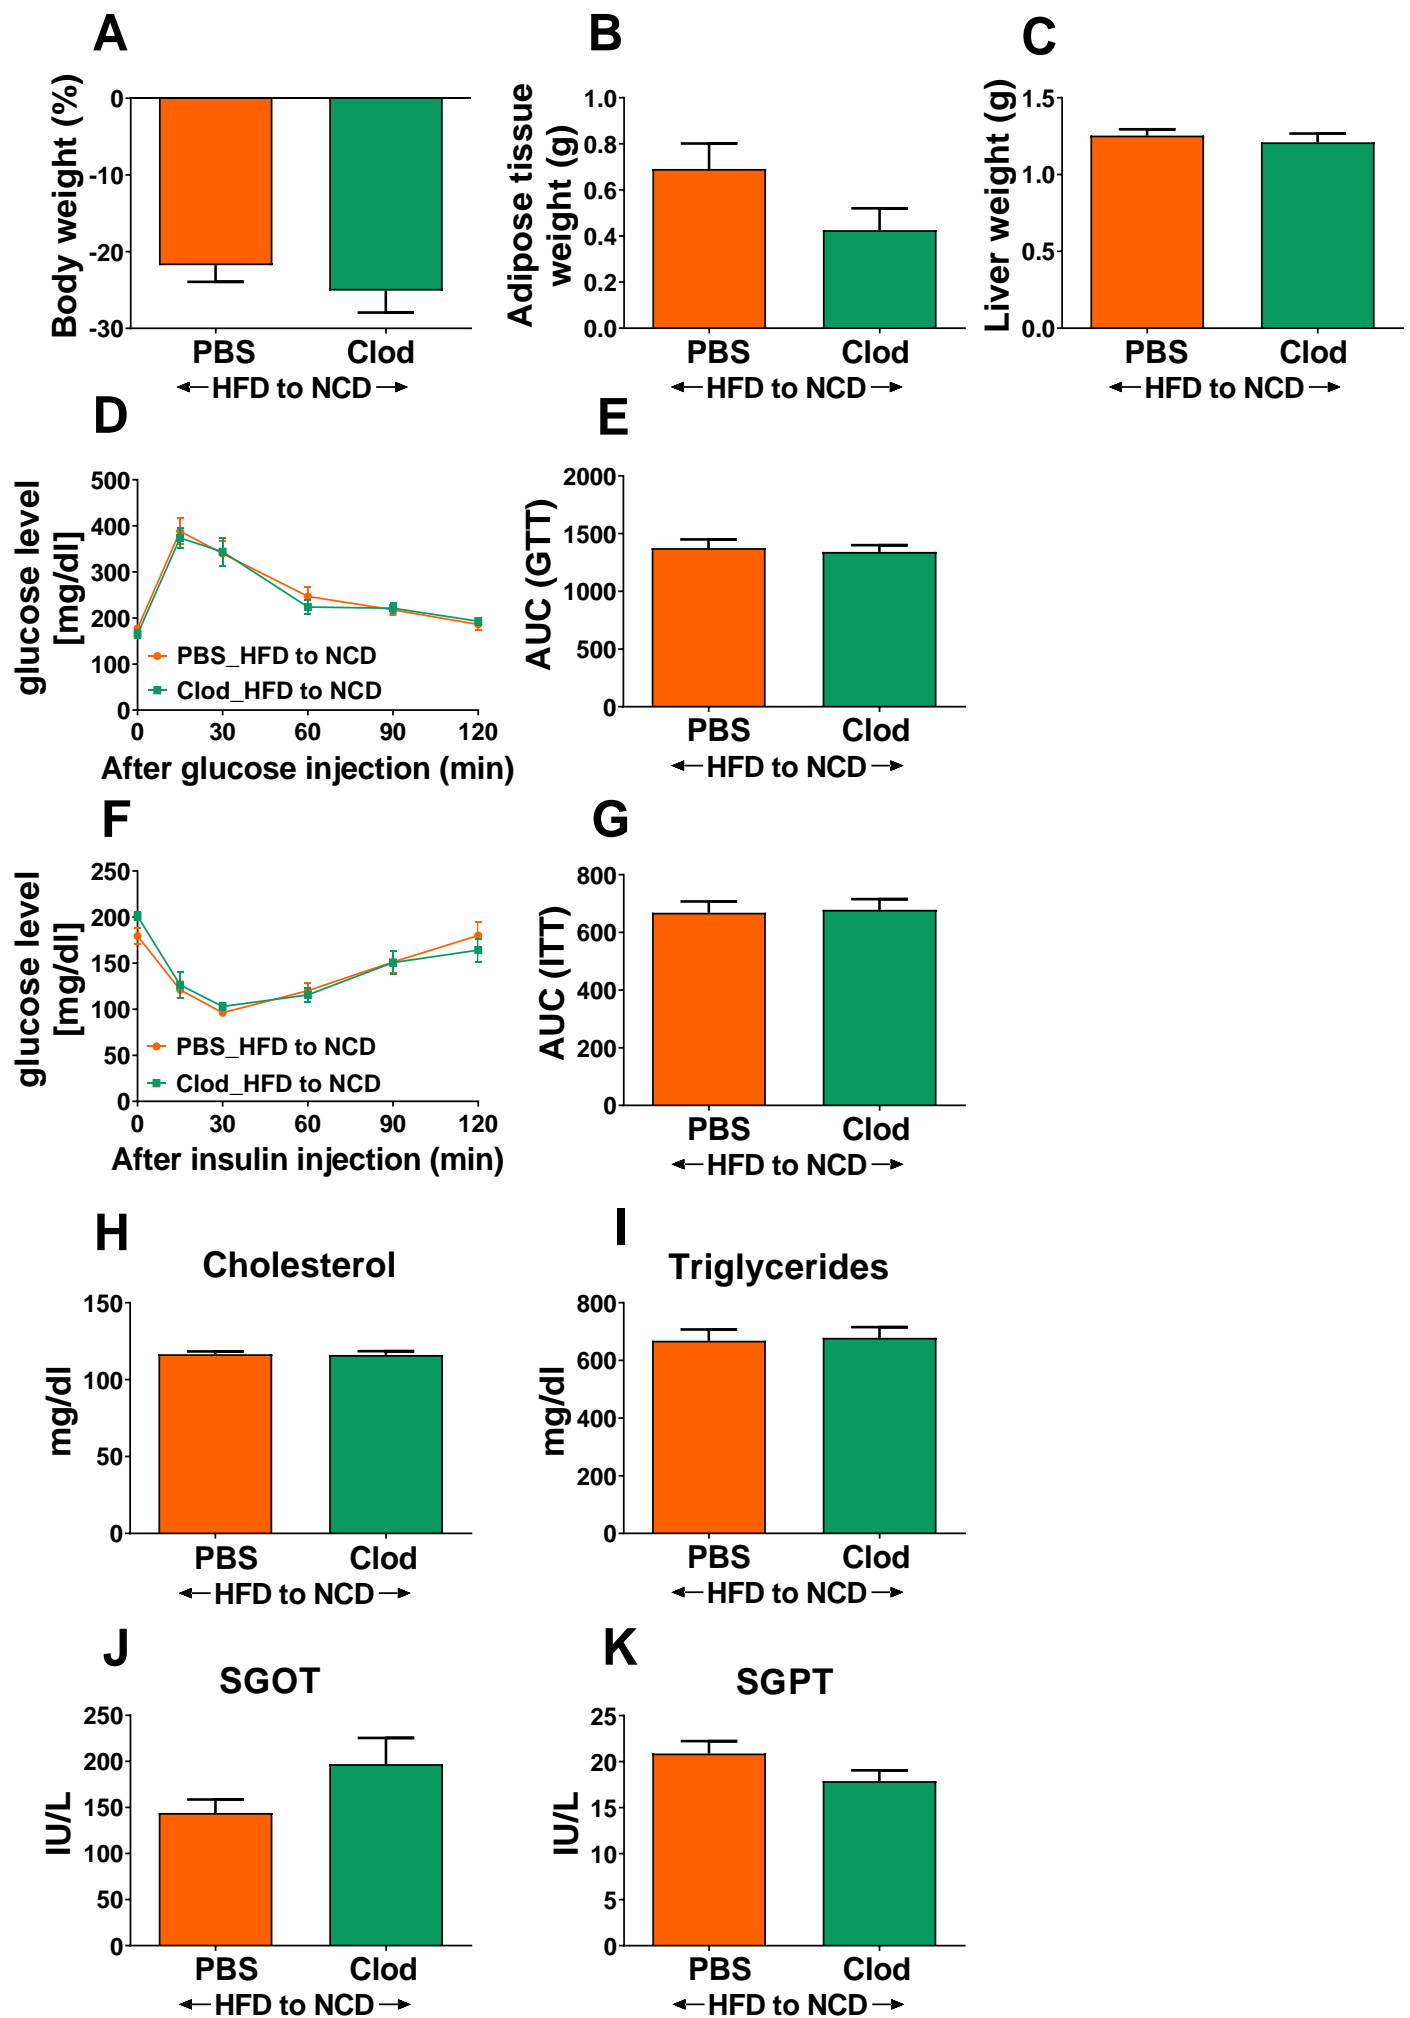

**Supplementary Figure 7: Depletion of macrophages does not affect the metabolic profile in formerly obese mice.** Animals were fed for 16 weeks on a HFD and switched to a NCD for 4 weeks. (A) Percent changes in body weight, (B) adipose tissue and (C) liver weight between clodronate liposomes (Clod) treated and control-liposomes (PBS) treated HFD to NCD mice. (D-G) Blood glucose levels over time after i.p. glucose (GTT) or insulin (ITT) challenge. Blood glucose levels over time (D, F) and area under the curve of the GTT (E) and ITT (G) challenge. (H) Serum cholesterol, (I) triglyceride, (J) SGOT, and (K) SGPT levels in control and clodronate treated mice. Pooled data from n=2 experiments with 3-5 mice each. Statistical significance was analysed by Mann Whitney U test (A-C, E, G-K) or 2-Way ANOVA followed by Tukey's multiple comparisons test (D, F).
